# Supplementary material for: Planning spatial sampling of the soil from an uncertain reconnaissance variogram
Source: Copernicus journal article supplement (doi:10.5194/soil-3-235-2017), 2017-12-13
Supplement: Supplementary file 1 [file soil-3-235-2017-supplement.zip]

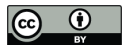

## *Supplement of*

# **Planning spatial sampling of the soil from an uncertain reconnaissance variogram**

**R. Murray Lark et al.**

*Correspondence to:* R. Murray Lark ([mlark@bgs.ac.uk](mailto:mlark@bgs.ac.uk))

- [soil-3-235-2017-supplement-title-page.pdf](#)
- [Mugala\\_U.txt](#)

The copyright of individual parts of the supplement might differ from the CC BY 4.0 License.
