# Supplementary material for: Planning spatial sampling of the soil from an uncertain reconnaissance variogram
Source: Copernicus journal article supplement (doi:10.5194/soil-3-235-2017), 2017-12-13
Supplement: Supplementary file 2 [file soil-3-235-2017-supplement.zip]

Archive with 2 entries (2 files):
- soil-3-235-2017-supplement-title-page.pdf
- Mugala_U.txt
