# Supplementary material for: Planning spatial sampling of the soil from an uncertain reconnaissance variogram
Source: Copernicus journal article supplement (doi:10.5194/soil-3-235-2017), 2017-12-13
Supplement: Supplementary file 2 [file soil-3-235-2017-supplement.zip › Mugala_U.txt]

Easting		Northing	U_mg_per_kg
619646.39	8586182.11	3.8
619593.29	8586152.03	4.5
619601.21	8586150.66	4.2
619603.18	8586152.87	4.2
619655.74	8586186.39	3.6
619743.04	8586189.78	2.9
619751.38	8586185.87	3.1
619753.66	8586187.52	3
619678.49	8586095.71	4.3
619625.6	8586064.73	4.8
619634.16	8586061.6	3.9
619635.67	8586061.7	4.3
619686.44	8586103.52	4.2
619768.81	8586072.31	3.6
619760.87	8586070.02	4
619759.67	8586069.14	3.6
619690.08	8586014.47	4.9
619626.2	8586003.79	5.2
619635.62	8585998.89	5
619636.18	8585999.77	4.5
619700.8	8586008.34	4.4
619780.86	8585995.95	4.2
619792.27	8585998.77	3.9
619793.03	8585999.88	4.2
619694.74	8585937.14	3.7
619630.36	8585936.08	4.7
619617.52	8585927.84	4.8
619617.19	8585927.95	4.8
619709.37	8585932.87	4.8
619783.93	8585926.36	3.7
619780.02	8585928.25	4.3
619778.51	8585928.37	4.1
619702.53	8585854.26	4.1
619647.12	8585841.78	4.9
619652.25	8585848.5	4.9
619651.37	8585848.62	5.1
619719.13	8585852.09	3.8
619797.09	8585880.95	3.5
619787.97	8585883.54	4.2
619787.22	8585883.98	3.9
619692.48	8585763.6	4.6
619638.48	8585750.23	3.8
619634.74	8585741.18	3.7
619634.96	8585739.41	3.7
619772.89	8585807.5	3.9
619809.36	8585882.78	3.8
619809.86	8585873.71	4.1
619808.46	8585875.26	4.3
619796.22	8585754.21	5.2
619680.96	8585657.7	4.8
619684.93	8585647.17	5.1
619686.34	8585647.61	5.4
619738.05	8585706.12	4.5
619798.6	8585753.87	3.5
619808.48	8585753.38	4
619808.16	8585754.93	3.7
619735.5	8585617.2	5.2
619693.73	8585572.69	5
619705.23	8585569.99	5.1
619707.93	8585568.98	4.5
619750.22	8585634.28	5.3
619795.25	8585705.99	4.5
619803.72	8585707.17	4.5
619803.72	8585707.06	4.9
